# Supplementary material for: A curcumin quantum dot blended polyacrylonitrile electrospun nanofiber coating on 316 L SS for improved corrosion resistance in the marine environment
Source: Royal Society of Chemistry journal article supplement (doi:10.1039/d4ra05075d), 2024-01-01
Supplement: d4ra05075d1.pdf [file d4ra05075d1.pdf]

## SUPPLEMENTARY DATA

### SUPPLEMENTARY FIGURES

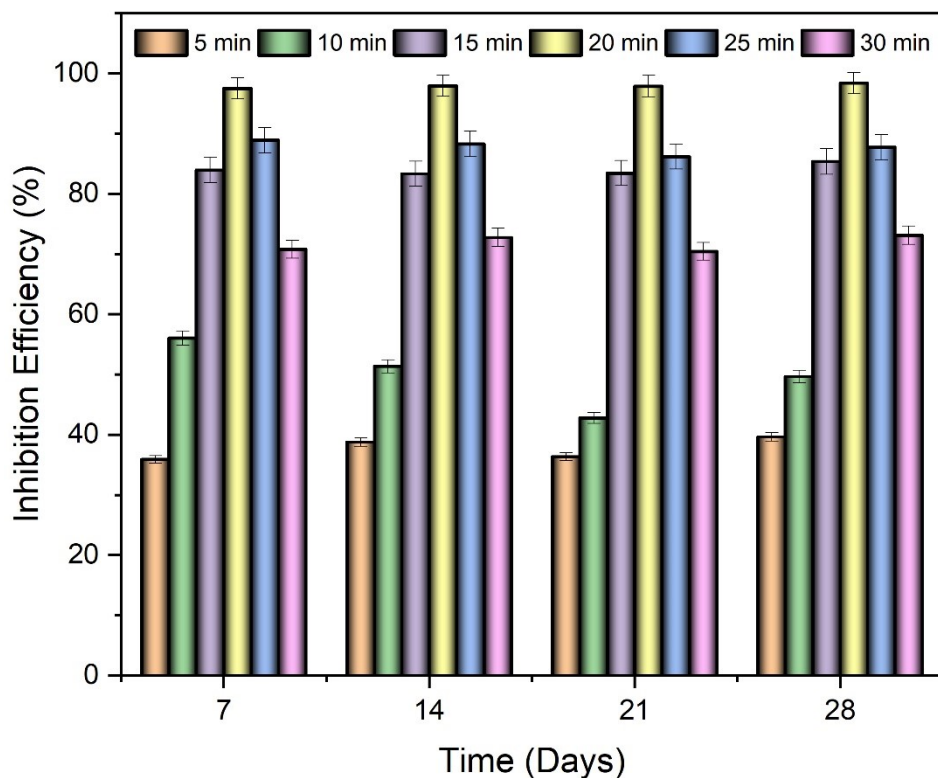

Fig. S1. Inhibition efficiency from weight loss studies

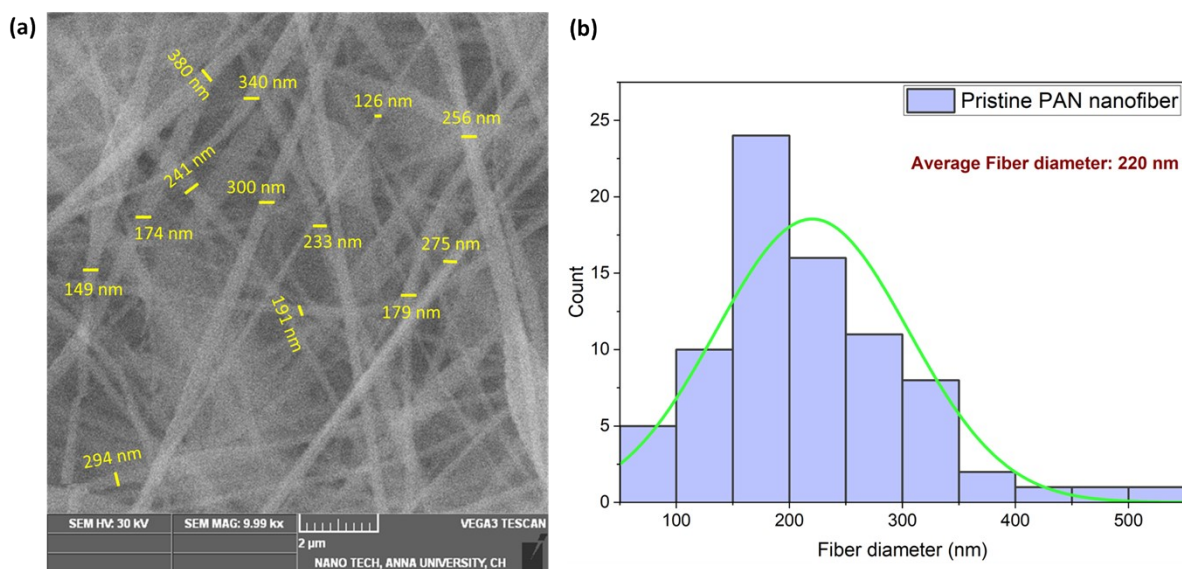

**Fig. S2.** Fiber diameter of pristine PAN nanofiber coated 316 L SS and its corresponding histogram

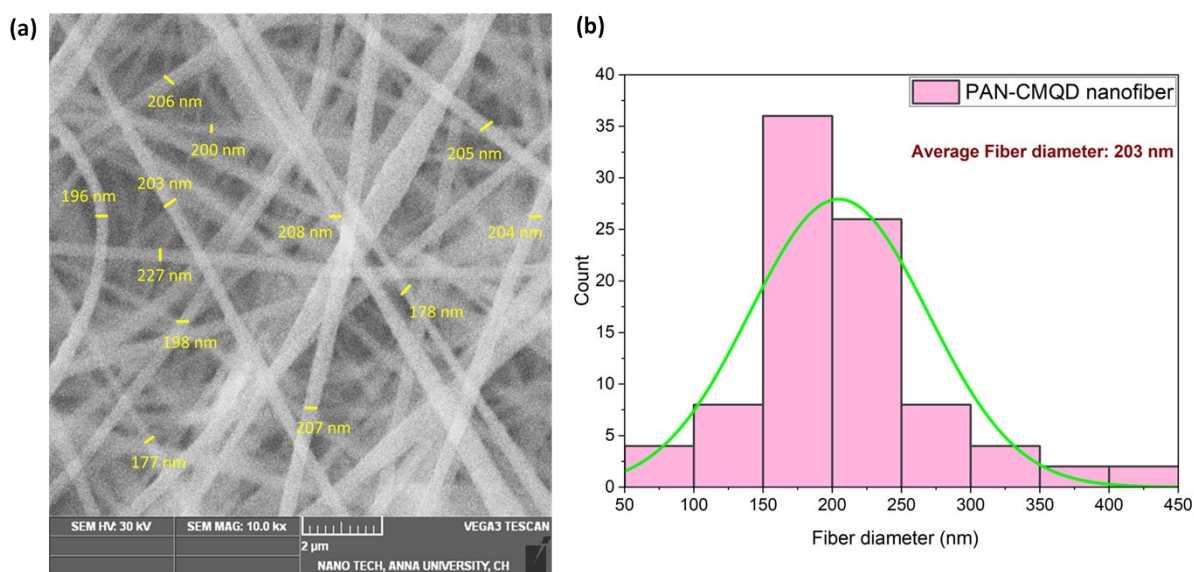

**Fig. S3.** Fiber diameter of PAN-CMQD nanofiber coated 316 L SS and its corresponding histogram

## SUPPLEMENTARY TABLES

**Table S1.** Experimental data of weight loss study

| 316 L SS        | Time (Days) | CR (mm/year)    | IE (%) |
|-----------------|-------------|-----------------|--------|
| <b>Uncoated</b> |             |                 |        |
|                 | 7           | 0.024333±0.0012 | -      |
|                 | 14          | 0.02221±0.0013  | -      |
|                 | 21          | 0.02027±0.0011  | -      |
|                 | 28          | 0.02205±0.0014  | -      |
| <b>5 min</b>    |             |                 |        |
|                 | 7           | 0.0156±0.00081  | 35.88  |
|                 | 14          | 0.0136±0.00044  | 38.76  |
|                 | 21          | 0.0129±0.00095  | 36.35  |
|                 | 28          | 0.0133±0.00052  | 39.64  |
| <b>10 min</b>   |             |                 |        |
|                 | 7           | 0.0107±0.0012   | 56.03  |

|               |    |                  |       |
|---------------|----|------------------|-------|
|               | 14 | 0.0108±0.0009    | 51.35 |
|               | 21 | 0.0116±0.0010    | 42.77 |
|               | 28 | 0.0111±0.0007    | 49.65 |
| <b>15 min</b> |    |                  |       |
|               | 7  | 0.0039±0.00054   | 83.97 |
|               | 14 | 0.00372±0.00029  | 83.34 |
|               | 21 | 0.003358±0.00035 | 83.43 |
|               | 28 | 0.00322±0.00056  | 85.39 |
| <b>20 min</b> |    |                  |       |
|               | 7  | 0.00061±0.000012 | 97.50 |
|               | 14 | 0.00047±0.000025 | 97.92 |
|               | 21 | 0.00043±0.000031 | 97.87 |
|               | 28 | 0.00035±0.000033 | 98.41 |
| <b>25 min</b> |    |                  |       |
|               | 7  | 0.0027±0.00030   | 88.90 |
|               | 14 | 0.0026±0.00022   | 88.29 |
|               | 21 | 0.0028±0.00017   | 86.18 |
|               | 28 | 0.0027±0.00012   | 87.75 |
| <b>30 min</b> |    |                  |       |
|               | 7  | 0.0071±0.00042   | 70.81 |
|               | 14 | 0.00602±0.00019  | 72.76 |
|               | 21 | 0.00599±0.00036  | 70.44 |
|               | 28 | 0.00593±0.00012  | 73.11 |

**Table S2.** The electrochemical parameters obtained from PD plot

| Sample            | $E_{\text{corr}}$ (V) | $I_{\text{corr}}$ (A/cm <sup>2</sup> ) | $\beta_a$ (V/dec) | $\beta_c$ (V/dec)     | IE (%) |
|-------------------|-----------------------|----------------------------------------|-------------------|-----------------------|--------|
| Uncoated 316 L SS | -0.432795699          | -4.9133*10 <sup>-6</sup>               | 0.38751 ± 0.00164 | -0.05578 ± 0.0017     | -      |
| Etched 316 L SS   | -0.33172              | -2.22473*10 <sup>-6</sup>              | 0.18785 ± 0.00373 | -0.15494 ± 0.00196    | 54.72  |
| PAN/316 L SS      | -0.251612903          | - 1.904296875*10 <sup>-6</sup>         | 0.28878 ± 0.00172 | -0.21711 ± 8.53888E-4 | 61.24  |
| PAN-CMQD/316 L SS | -0.0940860215         | -4.0588*10 <sup>-8</sup>               | 0.52141 ± 0.00567 | -0.37696 ± 0.00251    | 99.18  |

**Table S3** EIS parameters obtained from ZSmipwin software for uncoated 316 L SS, etched 316 L SS, PAN coated 316 L SS and PAN-CMQD coated 316 L SS.

| Parameters                             | Uncoated 316 L SS      | Etched 316 L SS        | PAN/ 316 L SS           | PAN-CMQD/ 316 L SS    |
|----------------------------------------|------------------------|------------------------|-------------------------|-----------------------|
| $R_s$<br>(Ohm cm <sup>2</sup> )        | 24.63                  | 26.89                  | 29.12                   | 0.02419               |
| $Q_{di}$<br>(S sn cm <sup>-2</sup> )   | 6.353*10 <sup>-5</sup> | 1.793*10 <sup>-4</sup> | 3.467 *10 <sup>-4</sup> | 7.69E-8               |
| $n_{di}$                               | 0.8                    | 0.8                    | 0.8                     | 0.8288                |
| $R_{ct}$<br>(Ohm cm <sup>2</sup> )     | 795                    | 1989                   | 2.395*10 <sup>15</sup>  | 5.851*10 <sup>4</sup> |
| $Q_{coat}$<br>(S sn cm <sup>-2</sup> ) | -                      | -                      | 2.322*10 <sup>-8</sup>  | 4.874E-5              |
| $n_{coat}$                             | -                      | -                      | 0.8                     | 1                     |
| $R_{coat}$<br>(Ohm cm <sup>2</sup> )   | -                      | -                      | 1029                    | 29.54                 |
| $\chi^2$                               | 6.576*10 <sup>-3</sup> | 2.90*10 <sup>-2</sup>  | 1.261*10 <sup>-2</sup>  | 9.01*10 <sup>-4</sup> |

**Table S4** Phase angle value of HFR and LFR for the uncoated and coated 316 L SS for the 1<sup>st</sup> and 30<sup>th</sup> day of immersion in corrosive electrolyte.

| -Phase angle ( $\theta$ )            | Days             | Uncoated 316 L SS | PAN-CMQD/316 L SS |
|--------------------------------------|------------------|-------------------|-------------------|
| <b>Low frequency Region (LFR)</b>    | 1 <sup>st</sup>  | 15 ± 0.405        | 72 ± 1.512        |
|                                      | 30 <sup>th</sup> | 3 ± 0.081         | 70 ± 1.47         |
| <b>Higher Frequency region (HER)</b> | 1 <sup>st</sup>  | 25 ± 0.40         | 51 ± 0.867        |
|                                      | 30 <sup>th</sup> | 16 ± 0.256        | 48 ± 0.816        |

**Table S5** Comparison with the current state of art with respect to nanofiber based anticorrosive coatings.

| S. No. | NANOFIBER COATED METALS                                  | COATING METHOD         | CORROSION MEDIUM | PERFORMANCE (IE %) | REFERENCES |
|--------|----------------------------------------------------------|------------------------|------------------|--------------------|------------|
| 1.     | Polyaniline/cellulose nanofiber coated Q235 carbon steel | TEMPO oxidation method | 3.5 wt.% NaCl    | 99.11              | 68         |
| 2.     | ZnO-NiO-CuO/ polycaprolactone                            | Electrospinning        | 1 M HCl          | 94.8 %             | 69         |

|    |                                                                             |                                                                     |               |                                                                        |           |
|----|-----------------------------------------------------------------------------|---------------------------------------------------------------------|---------------|------------------------------------------------------------------------|-----------|
|    | nanofiber coated mild steel                                                 |                                                                     |               |                                                                        |           |
| 3. | Carbon nanofiber coated AISI 1020 steel and AZ31 magnesium alloys           | plasma sputter, accompanied by the chemical vapor deposition method | 3.5 wt.% NaCl | Coated steel 97% and AZ31 magnesium alloy 98 %                         | 70        |
| 4. | Polyvinyl chloride nanofiber coated Aluminum (Al)<br>Steel (S)<br>Brass (B) | Electrospinning                                                     | 3.5 wt.% NaCl | 99.75 for Al<br>78.33 for Steel and<br>89.10 for brass                 | 71        |
| 5. | PAN-GOCM and PAN-BDMCAQD coated 316 L Stainless Steel                       | Electrospinning                                                     | 3.5 wt.% NaCl | 99.63 % for PAN-GOCM/ 316 L SS and<br>99.86 % for PAN-BDMCAQD/316 L SS | 48        |
| 6. | PVC-Ceria coated Aluminium                                                  | Electrospinning                                                     | 0.1 M HCl     | 85.7                                                                   | 72        |
| 7. | PAN-CMQD coated 316 L SS                                                    | Electrospinning                                                     | 3.5 wt.% NaCl | 99.18%                                                                 | This work |
